# Supplementary figures and images for: Genome structure and emerging evidence of an incipient sex chromosome in Populus
Source: HighWire-hosted journal article supplement (doi:10.1101/gr.7076308), 2008-02-06

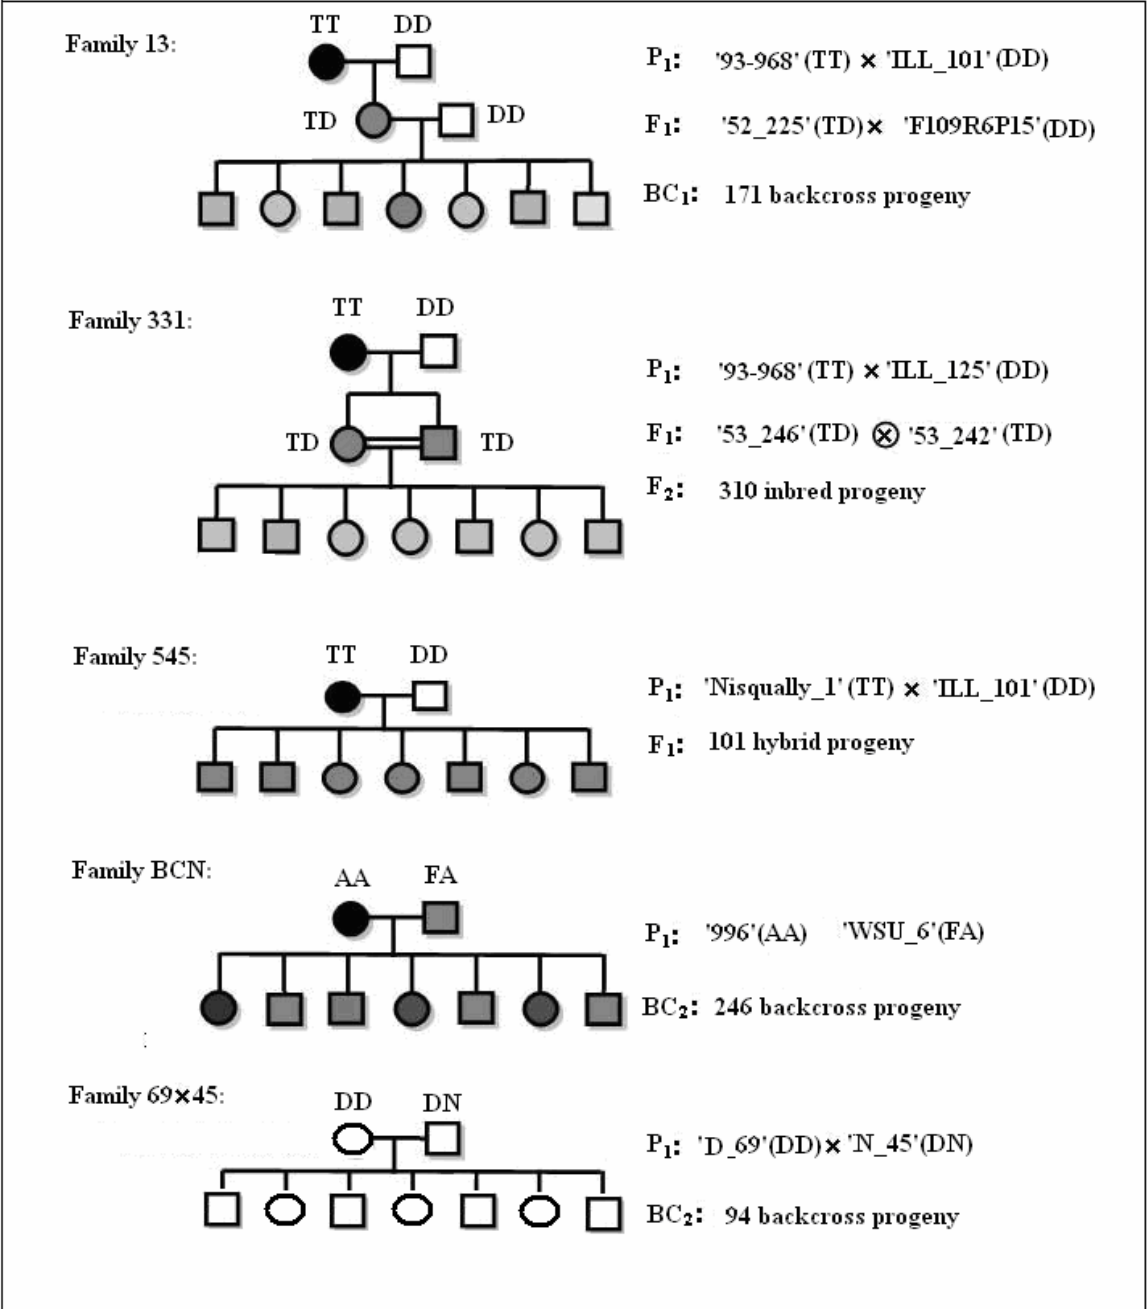

Supplemetnal Figure 1

Supplement: Suppl1._Fig.1.pdf [file Suppl1._Fig.1.pdf]

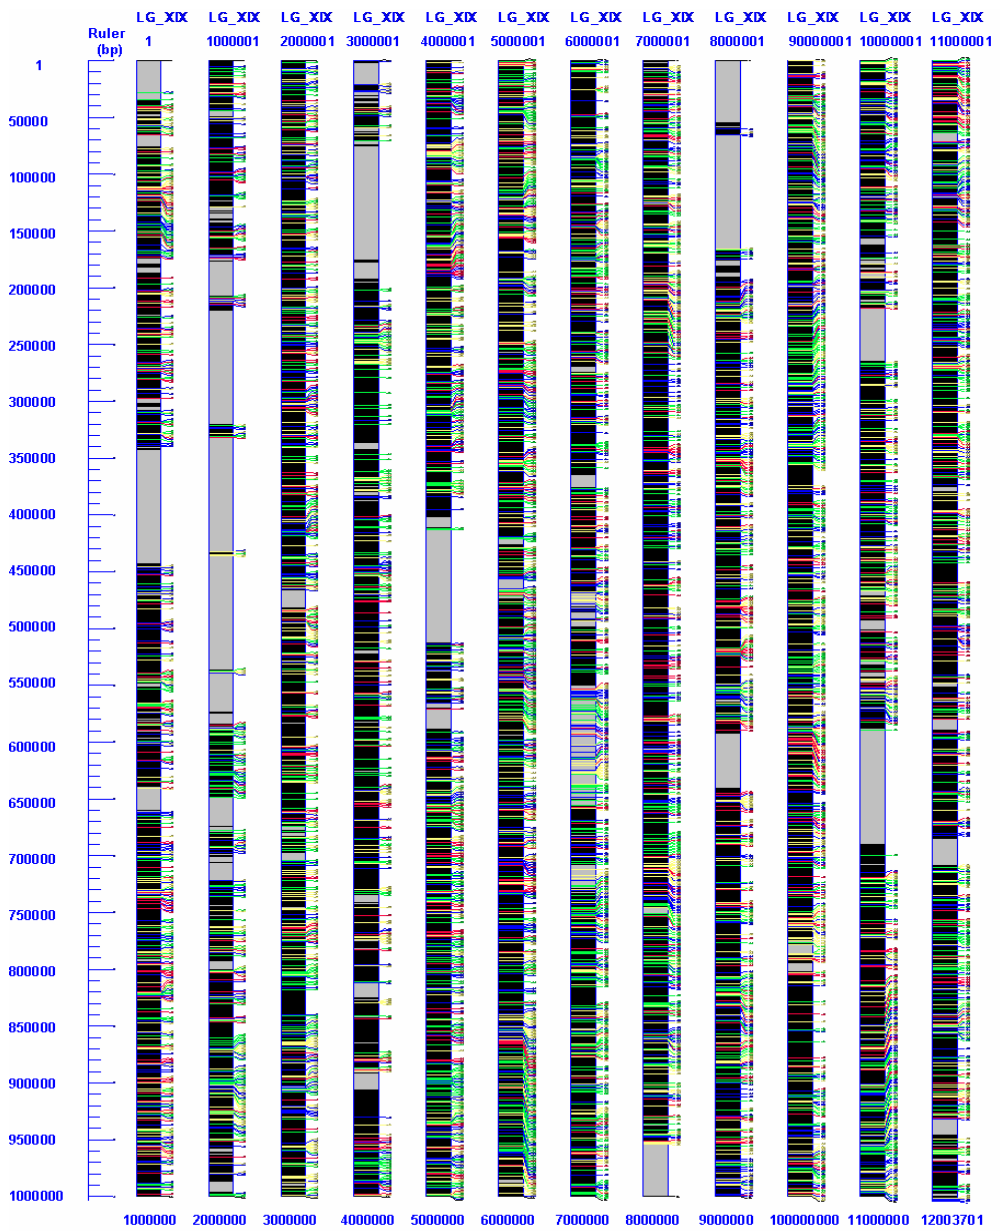

Supplemental Figure 4

Supplement: Suppl1._Fig.4.pdf [file Suppl1._Fig.4.pdf]

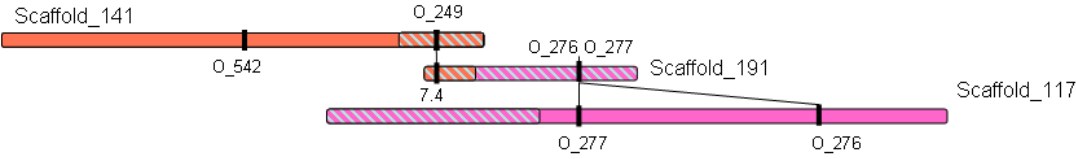

Supplemental Figure 5

Supplement: Suppl1._Fig.5.pdf [file Suppl1._Fig.5.pdf]
